# Supplementary material
Source: bioRxiv or medRxiv preprint supplement (https://www.biorxiv.org/highwire/filestream/26879/field_highwire_adjunct_files/0/095265-1.pdf)
Supplement: Supplementary file [file 095265-1.pdf]

**Table S1 : Sources of *Saccharomyces cerevisiae* strains and their genotypes.**

| Name      | Strain Source <sup>a</sup> | Geographic Origin                       | Habitat Origin                          | Habitat Category <sup>b</sup> | <i>structure</i> lineage <sup>c</sup> | Locus-by-locus lineage <sup>c</sup> |
|-----------|----------------------------|-----------------------------------------|-----------------------------------------|-------------------------------|---------------------------------------|-------------------------------------|
| 273614Nm  | NCYC                       | Royal Victoria Infirmary, Newcastle, UK | Clinical isolate (Fecal)                | Human infections              | Admixed                               | Admixed                             |
| 322134Sm  | NCYC                       | Royal Victoria Infirmary, Newcastle, UK | Clinical isolate (Throat- sputum)       | Human infections              | Admixed                               | Admixed                             |
| 378604Xm  | NCYC                       | Royal Victoria Infirmary, Newcastle, UK | Clinical isolate (Sputum)               | Human infections              | Admixed                               | Admixed                             |
| AN1f2s1   | Bensasson                  | Agios Nikolaos, Greece                  | Rotting fig with fly larvae             | Fruit or flower               | Admixed                               | Admixed                             |
| AN1g2s1   | Bensasson                  | Agios Nikolaos, Greece                  | Rotting fig with fly larvae             | Fruit or flower               | Admixed                               | Admixed                             |
| AN3e1s1   | Bensasson                  | Agios Nikolaos, Greece                  | Fig                                     | Fruit or flower               | Admixed                               | Wine                                |
| ARN019As1 | Wray*                      | N. Carolina, USA                        | Grape, <i>Vitis vinifera</i> Chardonnay | Fruit or flower               | Wine                                  | Wine                                |
| ARN020As1 | Wray*                      | N. Carolina, USA                        | Grape, <i>V. vinifera</i> Cabernet      | Fruit or flower               | Admixed                               | Wine                                |
| ARN022As1 | Wray*                      | N. Carolina, USA                        | Grape, <i>V. vinifera</i> Syrah         | Fruit or flower               | Wine                                  | Wine                                |
| ARN056As1 | Wray*                      | N. Carolina, USA                        | Grape, <i>V. vinifera</i> Reisling      | Fruit or flower               | Admixed                               | Admixed                             |
| ARN179As1 | Wray*                      | N. Carolina, USA                        | Grape, <i>V. vinifera</i> Sangiovese    | Fruit or flower               | NCO                                   | NCO                                 |

**Table S1 – continued from previous page**

| Name       | Strain Source <sup>a</sup> | Geographic Origin            | Habitat Origin                              | Habitat Category <sup>b</sup> | <i>structure</i> lineage <sup>c</sup> | Locus-by-locus lineage <sup>c</sup> |
|------------|----------------------------|------------------------------|---------------------------------------------|-------------------------------|---------------------------------------|-------------------------------------|
| ARN202Bs1  | Wray*                      | N. Carolina, USA             | Grape, <i>V. vinifera</i> Syrah             | Fruit or flower               | NCO                                   | NCO                                 |
| ARN231As1  | Wray*                      | N. Carolina, USA             | Grape, <i>V. vinifera</i> Carlos            | Fruit or flower               | Admixed                               | Admixed                             |
| ARN239As1  | Wray*                      | N. Carolina, USA             | Grape, <i>V. vinifera</i> Carlos            | Fruit or flower               | NCO                                   | NCO                                 |
| ARN244As1  | Wray*                      | N. Carolina, USA             | Grape, <i>V. vinifera</i> Carlos            | Fruit or flower               | Admixed                               | Admixed                             |
| ARN245As1  | Wray*                      | N. Carolina, USA             | Grape, <i>V. vinifera</i> Carlos            | Fruit or flower               | Admixed                               | Admixed                             |
| BC187m     | NCYC                       | Napa Valley, California, USA | Barrel fermentation                         | Fermentations                 | Admixed                               | Admixed                             |
| DBVPG1106m | NCYC                       | Australia                    | Grapes                                      | Fruit or flower               | Wine <sup>R</sup>                     | Wine <sup>R</sup>                   |
| DBVPG1373m | NCYC                       | Netherlands                  | Soil                                        | Soil and unknown              | Admixed                               | Wine                                |
| DBVPG1788m | NCYC                       | Turku, Finland               | Soil                                        | Soil and unknown              | Admixed                               | Wine                                |
| DBVPG1853m | NCYC                       | Ethiopia, East Africa        | White Teff                                  | Fermentations                 | Admixed                               | Wine                                |
| DBVPG6044m | NCYC                       | West Africa                  | Bili wine, from <i>Osbeckia grandiflora</i> | Fermentations                 | WA <sup>R</sup>                       | WA <sup>R</sup>                     |
| DBVPG6765m | NCYC                       | Unknown                      | Unknown                                     | Soil and unknown              | Admixed                               | Wine                                |

**Table S1 – continued from previous page**

| Name     | Strain Source <sup>a</sup> | Geographic Origin       | Habitat Origin                                  | Habitat Category <sup>b</sup> | <i>structure</i> lineage <sup>c</sup> | Locus-by-locus lineage <sup>c</sup> |
|----------|----------------------------|-------------------------|-------------------------------------------------|-------------------------------|---------------------------------------|-------------------------------------|
| HUN9s1   | Barrio*                    | Debrecen, Hungary       | Oak forest soil                                 | Oak or similar trees          | Admixed                               | EUO                                 |
| K11m     | NCYC                       | Japan                   | Shochu sake, Awamori                            | Fermentations                 | Sake <sup>R</sup>                     | Sake <sup>R</sup>                   |
| L-1374m  | NCYC                       | Cauquenes, Chile        | Fermentation from must                          | Fermentations                 | Wine <sup>R</sup>                     | Wine <sup>R</sup>                   |
| L-1528m  | NCYC                       | Cauquenes, Chile        | Fermentation from must                          | Fermentations                 | Wine                                  | Wine                                |
| NCYC110m | NCYC                       | West Africa             | Ginger beer from <i>Z. officinale</i>           | Fermentations                 | WA <sup>R</sup>                       | WA <sup>R</sup>                     |
| NCYC361m | NCYC                       | Ireland                 | Beer spoilage strain from wort                  | Fermentations                 | Admixed                               | Admixed                             |
| PYR4b1s1 | Bensasson                  | Agios Nikolaos, Greece  | Oak bark, <i>Quercus pubescens</i>              | Oak or similar trees          | EUO                                   | EUO                                 |
| RM11-1a  | Broad Institute            | California, USA         | Fermenting grape must                           | Fermentations                 | Admixed                               | Wine                                |
| S288cRef | SGD                        | Merced, California, USA | Rotting fig, and multiple crosses               | Fruit or flower               | Admixed                               | Admixed                             |
| SDO1s1   | Diezmann*                  | N. Carolina, USA        | Tulip tree soil, <i>Liriodendron tulipifera</i> | Oak or similar trees          | NCO <sup>R</sup>                      | NCO <sup>R</sup>                    |
| SDO2s1   | Diezmann*                  | N. Carolina, USA        | Oak soil, <i>Q. prinus</i>                      | Oak or similar trees          | NCO                                   | NCO                                 |
| SDO3s1   | Diezmann*                  | N. Carolina, USA        | <i>Gaultheria</i> sp. soil                      | Oak or similar trees          | NCO <sup>R</sup>                      | NCO <sup>R</sup>                    |

**Table S1 – continued from previous page**

| Name           | Strain Source <sup>a</sup> | Geographic Origin        | Habitat Origin              | Habitat Category <sup>b</sup> | <i>structure</i> lineage <sup>c</sup> | Locus-by-locus lineage <sup>c</sup> |
|----------------|----------------------------|--------------------------|-----------------------------|-------------------------------|---------------------------------------|-------------------------------------|
| SDO4s1         | Diezmann*                  | N. Carolina, USA         | Oak soil, <i>Q. prinus</i>  | Oak or similar trees          | NCO                                   | NCO                                 |
| SDO6s1         | Diezmann*                  | N. Carolina, USA         | Maple soil, <i>Acer</i> sp. | Oak or similar trees          | NCO                                   | NCO                                 |
| SDO7s1         | Diezmann*                  | N. Carolina, USA         | Oak soil, <i>Q. prinus</i>  | Oak or similar trees          | NCO                                   | NCO                                 |
| SDO8s1         | Diezmann*                  | N. Carolina, USA         | Oak soil, <i>Q. prinus</i>  | Oak or similar trees          | NCO                                   | Admixed                             |
| SDO9s1         | Diezmann*                  | N. Carolina, USA         | Oak soil, <i>Q. prinus</i>  | Oak or similar trees          | NCO                                   | Admixed                             |
| SK1m           | NCYC                       | USA                      | Soil                        | Soil and unknown              | Admixed                               | Admixed                             |
| SM01s1         | Diezmann*                  | N. Carolina, USA         | Oak soil, <i>Q. alba</i>    | Oak or similar trees          | Admixed                               | Admixed                             |
| SM02s1         | Diezmann*                  | N. Carolina, USA         | Oak soil, <i>Q. alba</i>    | Oak or similar trees          | Admixed                               | Admixed                             |
| SM12s1         | Diezmann*                  | N. Carolina, USA         | Maple soil, <i>Acer</i> sp. | Oak or similar trees          | NCO                                   | NCO                                 |
| SM17s1         | Diezmann*                  | N. Carolina, USA         | Oak soil, <i>Q. alba</i>    | Oak or similar trees          | NCO                                   | NCO                                 |
| SM66s1         | Diezmann*                  | N. Carolina, USA         | Oak soil, <i>Q. alba</i>    | Oak or similar trees          | NCO                                   | NCO                                 |
| SM69s1         | Diezmann*                  | N. Carolina, USA         | Oak soil, <i>Q. prinus</i>  | Oak or similar trees          | NCO                                   | NCO                                 |
| UWOPS03-461.4m | NCYC                       | Telok Senangin, Malaysia | Nectar, Bertram palm        | Fruit or flower               | MAL <sup>R</sup>                      | MAL <sup>R</sup>                    |

**Table S1 – continued from previous page**

| Name           | Strain Source <sup>a</sup> | Geographic Origin                  | Habitat Origin                             | Habitat Category <sup>b</sup> | <i>structure</i> lineage <sup>c</sup> | Locus-by-locus lineage <sup>c</sup> |
|----------------|----------------------------|------------------------------------|--------------------------------------------|-------------------------------|---------------------------------------|-------------------------------------|
| UWOPS05-217.3m | NCYC                       | Telok Senangin, Malaysia           | Nectar, Bertram palm                       | Fruit or flower               | MAL <sup>R</sup>                      | MAL <sup>R</sup>                    |
| UWOPS05-227.2m | NCYC                       | Telok Senangin, Malaysia           | Nectar, Bertram palm                       | Fruit or flower               | MAL                                   | MAL                                 |
| UWOPS83-787.3m | NCYC                       | Great Inagua Island, Bahamas       | Fruit, <i>Opuntia stricta</i>              | Fruit or flower               | Admixed                               | Admixed                             |
| UWOPS87-2421m  | NCYC                       | Puhelu Road, Maui, Hawaii          | Cladode, <i>Opuntia megacantha</i>         | Fruit or flower               | Admixed                               | Admixed                             |
| Y12m           | NCYC                       | Ivory Coast, West Africa           | Palm wine                                  | Fermentations                 | Sake                                  | Sake                                |
| Y55m           | NCYC                       | France                             | Grape                                      | Fruit or flower               | Admixed                               | Admixed                             |
| Y9m            | NCYC                       | Indonesia                          | Ragi                                       | Fermentations                 | Sake <sup>R</sup>                     | Sake <sup>R</sup>                   |
| YIIc17_E5m     | NCYC                       | Sauternes, France                  | Wine                                       | Fermentations                 | Admixed                               | Admixed                             |
| YJM789         | Wei et al 2007             | Missouri, USA                      | lung of AIDS patient with pneumonia        | Human infections              | Admixed                               | Admixed                             |
| YJM975m        | NCYC                       | Ospedali Riuniti di Bergamo, Italy | Vagina of patient suffering from vaginitis | Human infections              | Wine                                  | Wine                                |
| YJM978m        | NCYC                       | Ospedali Riuniti di Bergamo, Italy | Vagina of patient suffering from vaginitis | Human infections              | Wine                                  | Wine                                |

**Table S1 – continued from previous page**

| Name     | Strain Source <sup>a</sup> | Geographic Origin                  | Habitat Origin                             | Habitat Category <sup>b</sup> | <i>structure</i> lineage <sup>c</sup> | Locus-by-locus lineage <sup>c</sup> |
|----------|----------------------------|------------------------------------|--------------------------------------------|-------------------------------|---------------------------------------|-------------------------------------|
| YJM981m  | NCYC                       | Ospedali Riuniti di Bergamo, Italy | Vagina of patient suffering from vaginitis | Human infections              | Wine                                  | Wine                                |
| YPS128m  | NCYC                       | Pennsylvania, USA                  | Oak soil, <i>Q. alba</i>                   | Oak or similar trees          | PAO <sup>R</sup>                      | PAO <sup>R</sup>                    |
| YPS139s1 | Sniegowski*                | Pennsylvania, USA                  | Oak soil, <i>Quercus</i> sp.               | Oak or similar trees          | PAO                                   | PAO                                 |
| YPS396   | Sniegowski                 | Pennsylvania, USA                  | Oak soil, <i>Q. velutina</i>               | Oak or similar trees          | PAO                                   | PAO                                 |
| YPS400   | Sniegowski                 | Pennsylvania, USA                  | Oak soil, <i>Q. rubra</i>                  | Oak or similar trees          | PAO                                   | PAO                                 |
| YPS600   | Sniegowski                 | Pennsylvania, USA                  | Oak flux, <i>Q. alba</i>                   | Oak or similar trees          | PAO                                   | PAO                                 |
| YPS602   | Sniegowski                 | Pennsylvania, USA                  | Oak soil, <i>Q. alba</i>                   | Oak or similar trees          | PAO                                   | PAO                                 |
| YPS604   | Sniegowski                 | Pennsylvania, USA                  | Oak soil, <i>Q. velutina</i>               | Oak or similar trees          | PAO                                   | PAO                                 |
| YPS606m  | NCYC                       | Pennsylvania, USA                  | Oak bark, <i>Q. rubra</i>                  | Oak or similar trees          | PAO <sup>R</sup>                      | PAO <sup>R</sup>                    |
| YPS608   | Sniegowski                 | Pennsylvania, USA                  | Oak soil, <i>Q. rubra</i>                  | Oak or similar trees          | PAO                                   | PAO                                 |
| YPS610   | Sniegowski                 | Pennsylvania, USA                  | Oak bark, <i>Q. velutina</i>               | Oak or similar trees          | PAO                                   | PAO                                 |
| ZP560s1  | Sampaio*                   | Castelo de Vide, Portugal          | Oak bark, <i>Q. pyrenaica</i>              | Oak or similar trees          | EUO <sup>R</sup>                      | EUO <sup>R</sup>                    |

**Table S1 – continued from previous page**

| Name    | Strain Source <sup>a</sup> | Geographic Origin         | Habitat Origin                        | Habitat Category <sup>b</sup> | <i>structure</i> lineage <sup>c</sup> | Locus-by-locus lineage <sup>c</sup> |
|---------|----------------------------|---------------------------|---------------------------------------|-------------------------------|---------------------------------------|-------------------------------------|
| ZP561s1 | Sampaio*                   | Castelo de Vide, Portugal | Oak bark, <i>Q. pyrenaica</i>         | Oak or similar trees          | EUO                                   | EUO                                 |
| ZP562s1 | Sampaio*                   | Castelo de Vide, Portugal | Oak bark, <i>Q. ilex</i>              | Oak or similar trees          | EUO <sup>R</sup>                      | EUO <sup>R</sup>                    |
| ZP565s1 | Sampaio*                   | Castelo de Vide, Portugal | Chestnut bark, <i>Castanea sativa</i> | Oak or similar trees          | EUO                                   | EUO                                 |
| ZP568s1 | Sampaio*                   | Castelo de Vide, Portugal | Oak bark, <i>Q. pyrenaica</i>         | Oak or similar trees          | EUO                                   | EUO                                 |
| ZP577s1 | Sampaio*                   | Aldeia das Dez, Portugal  | Oak bark, <i>Q. faginea</i>           | Oak or similar trees          | Wine                                  | Wine                                |
| ZP578s1 | Sampaio*                   | Aldeia das Dez, Portugal  | Oak bark, <i>Q. faginea</i>           | Oak or similar trees          | Wine                                  | Wine                                |
| ZP579s1 | Sampaio*                   | Aldeia das Dez, Portugal  | Oak bark, <i>Q. pyrenaica</i>         | Oak or similar trees          | Admixed                               | Wine                                |
| ZP633s1 | Sampaio*                   | Castelo de Vide, Portugal | Oak bark, <i>Q. pyrenaica</i>         | Oak or similar trees          | EUO                                   | EUO                                 |
| ZP636s1 | Sampaio*                   | Castelo de Vide, Portugal | Chestnut bark, <i>Castanea sativa</i> | Oak or similar trees          | EUO                                   | EUO                                 |

\* We generated monosporic derivative strains from the original strain.

<sup>a</sup> The source of the parental strain.

<sup>b</sup> The categories used in Table 2.

<sup>c</sup> Lineage determined by *structure* or locus-by-locus phylogenetic analysis: NCO is North Carolina Oak; PAO is Pennsylvanian Oak; EUO is European Oak; MAL is Malaysian; and WA is West African.

<sup>R</sup> This strain was used as a reference strain for this lineage.
